# Supplementary material for: Globo H-KLH vaccine adagloxad simolenin (OBI-822)/OBI-821 in patients with metastatic breast cancer: phase II randomized, placebo-controlled study
Source: PubMed Central journal article supplement — J Immunother Cancer. 2020 Jul 22;8(2):e000342. doi: 10.1136/jitc-2019-000342 (PMC7380846; doi:10.1136/jitc-2019-000342), 2020-07-22
Supplement: jitc-2019-000342supp001.pdf [file jitc-2019-000342supp001.pdf]

### Supplemental Figure 1

**A**

Progression Free Survival (PFS) Assessed by Investigator Site (mITT)  
Subgroup Triple Negative Receptor

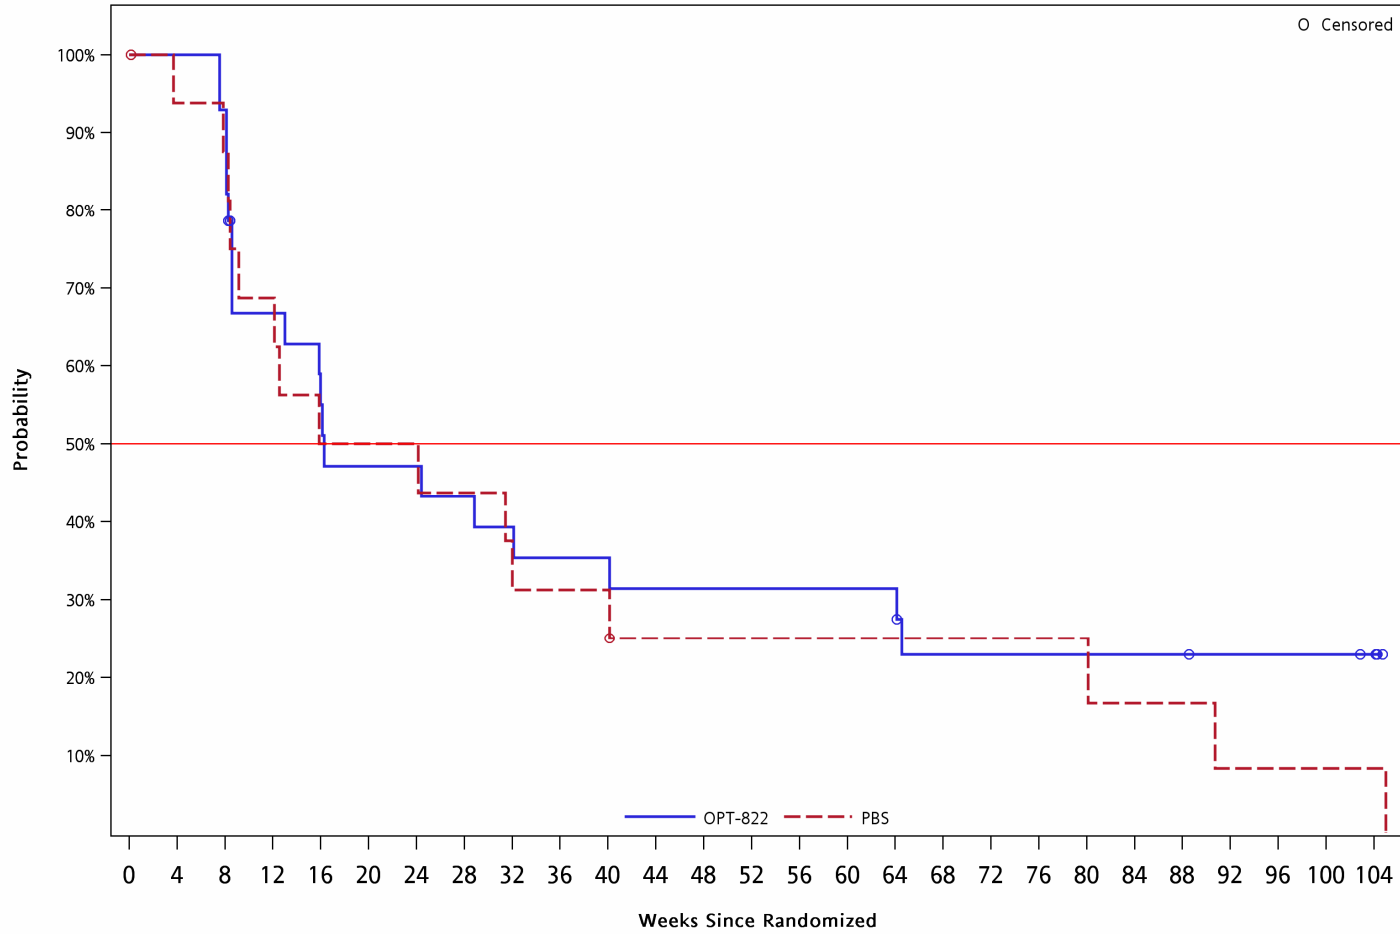

|         |    |    |    |    |    |   |   |   |   |   |   |   |   |   |
|---------|----|----|----|----|----|---|---|---|---|---|---|---|---|---|
| OPT-822 | 28 | 26 | 15 | 12 | 10 | 9 | 8 | 8 | 8 | 5 | 5 | 5 | 4 | 3 |
| PBS     | 17 | 14 | 8  | 8  | 6  | 5 | 3 | 3 | 3 | 3 | 3 | 2 | 1 | 1 |

**B**

Progression Free Survival (PFS) Assessed by Investigator Site (mITT)  
Subgroup ER and/or PR Positive Plus HER-2 Negative

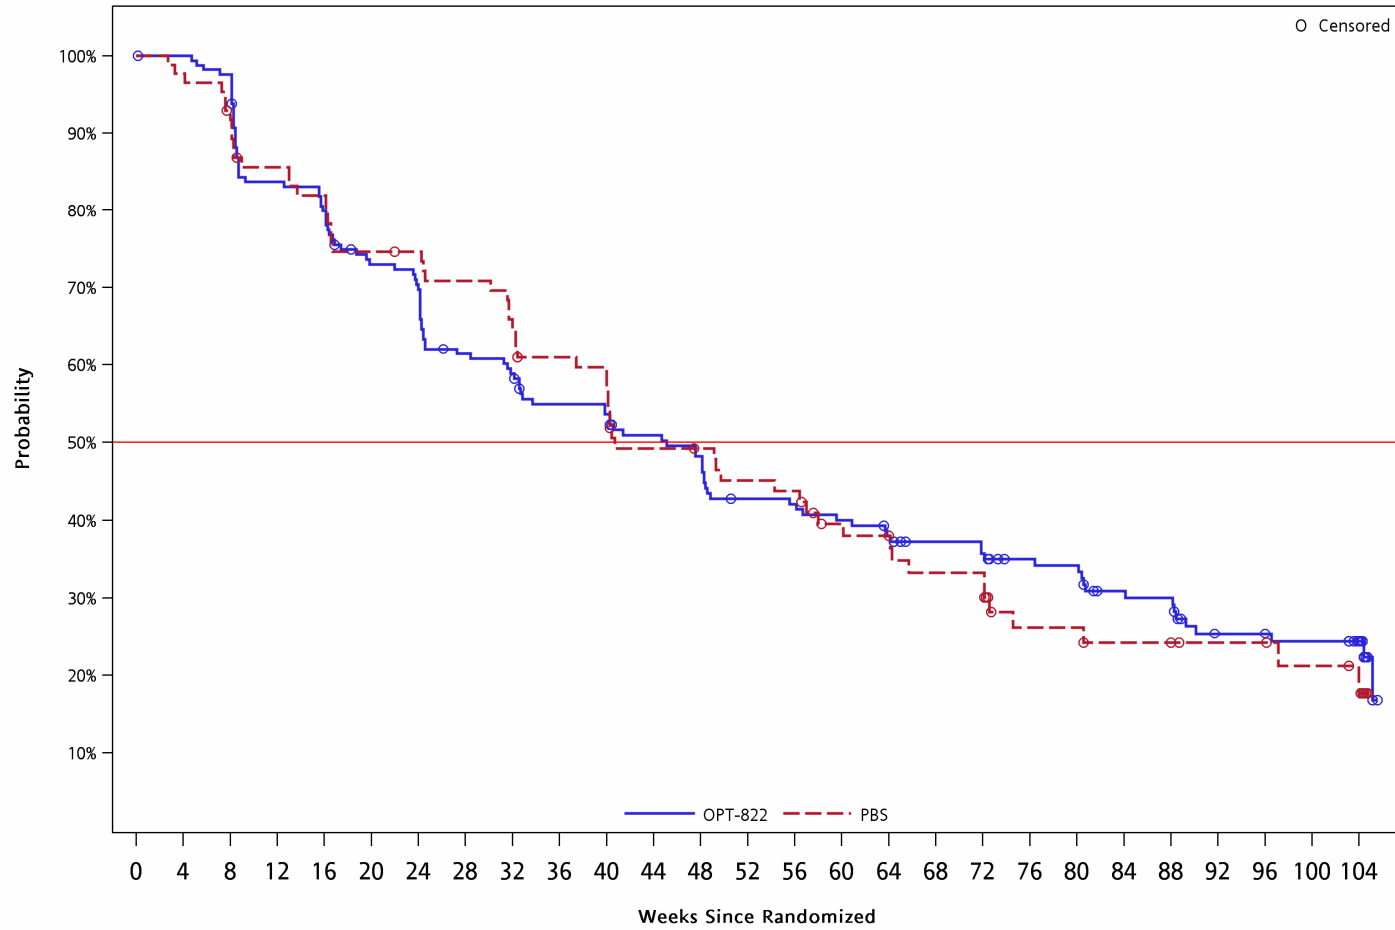

|         |     |     |     |     |    |    |    |    |    |    |    |    |    |    |
|---------|-----|-----|-----|-----|----|----|----|----|----|----|----|----|----|----|
| OPT-822 | 161 | 156 | 127 | 110 | 91 | 81 | 71 | 61 | 54 | 48 | 42 | 34 | 25 | 19 |
| PBS     | 84  | 77  | 67  | 60  | 53 | 46 | 36 | 32 | 25 | 21 | 13 | 11 | 9  | 6  |

**C**

**Progression Free Survival (PFS) Assessed by Investigator Site (mITT)  
Subgroup HER-2 Positive**

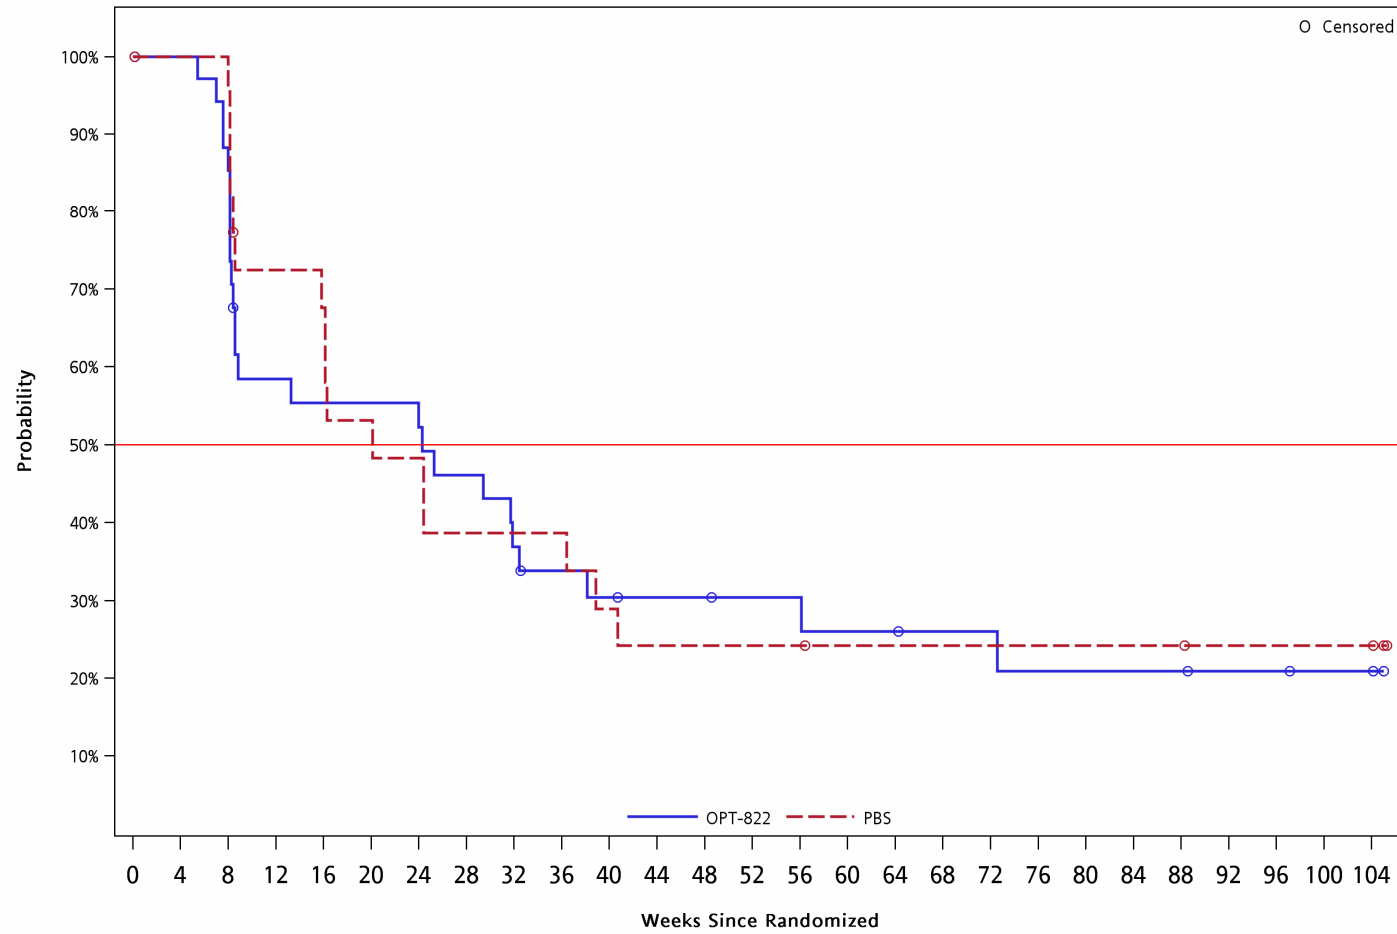

|         |    |    |    |    |    |   |   |   |   |   |   |   |   |   |
|---------|----|----|----|----|----|---|---|---|---|---|---|---|---|---|
| OPT-822 | 35 | 30 | 18 | 18 | 12 | 9 | 8 | 7 | 6 | 5 | 4 | 4 | 3 | 2 |
| PBS     | 23 | 22 | 14 | 10 | 8  | 6 | 5 | 5 | 4 | 4 | 4 | 4 | 3 | 3 |
