# Supplementary material for: Globo H-KLH vaccine adagloxad simolenin (OBI-822)/OBI-821 in patients with metastatic breast cancer: phase II randomized, placebo-controlled study
Source: PubMed Central journal article supplement — J Immunother Cancer. 2020 Jul 22;8(2):e000342. doi: 10.1136/jitc-2019-000342 (PMC7380846; doi:10.1136/jitc-2019-000342), 2020-07-22
Supplement: jitc-2019-000342supp003.pdf [file jitc-2019-000342supp003.pdf]

**Supplemental Table 1. Globo H expression by breast cancer tumor subtypes**

| <b>Globo H</b> | <b>HR+</b>       | <b>HER2+</b>     | <b>TNBC</b>      |
|----------------|------------------|------------------|------------------|
| <b>0</b>       | 29.65%<br>(n=51) | 26.32%<br>(n=10) | 24.24%<br>(n=8)  |
| <b>1+</b>      | 30.81%<br>(n=53) | 39.47%<br>(n=15) | 57.58%<br>(n=19) |
| <b>2+</b>      | 16.86%<br>(n=29) | 21.05%<br>(n=8)  | 0.00%<br>(n=0)   |
| <b>3+</b>      | 22.67%<br>(n=39) | 13.16%<br>(n=5)  | 18.18%<br>(n=6)  |

HER2+, human epidermal growth factor receptor 2-positive; HR+, hormone receptor-positive; TNBC, triple-negative breast cancer.
