# Supplementary material for: Globo H-KLH vaccine adagloxad simolenin (OBI-822)/OBI-821 in patients with metastatic breast cancer: phase II randomized, placebo-controlled study
Source: PubMed Central journal article supplement — J Immunother Cancer. 2020 Jul 22;8(2):e000342. doi: 10.1136/jitc-2019-000342 (PMC7380846; doi:10.1136/jitc-2019-000342), 2020-07-22
Supplement: jitc-2019-000342supp004.pdf [file jitc-2019-000342supp004.pdf]

**Supplemental Table 2. Baseline characteristics: 9 injections vs <9 injections**

| Item/Category                                                | 9 Injections    |                | <9 Injections   |                |
|--------------------------------------------------------------|-----------------|----------------|-----------------|----------------|
|                                                              | OBI-822 (N=104) | Placebo (N=64) | OBI-822 (N=120) | Placebo (N=60) |
| <b>IWRS 4-Combined Strata, n (%)</b>                         |                 |                |                 |                |
| Hormone non-user with disease                                | 18 (17)         | 17 (27)        | 55 (46)         | 25 (42)        |
| Hormone non-use without disease                              | 8 (8)           | 3 (5)          | 3 (3)           | 3 (5)          |
| Hormone user with disease                                    | 70 (67)         | 38 (59)        | 59 (49)         | 30 (50)        |
| Hormone user without disease                                 | 8 (8)           | 6 (9)          | 3 (3)           | 2 (3)          |
| <b>No. of Progressions After Metastatic Diagnosis, n (%)</b> |                 |                |                 |                |
| 0                                                            | 72 (69)         | 43 (67)        | 65 (54)         | 34 (57)        |
| 1                                                            | 25 (24)         | 20 (31)        | 42 (35)         | 17 (28)        |
| 2                                                            | 6 (6)           | 1 (2)          | 13 (11)         | 9 (15)         |
| 3                                                            | 1 (1)           | 0 (0)          | 0 (0)           | 0 (0)          |
| <b>Molecular Subtypes, n (%)</b>                             |                 |                |                 |                |
| ER+ and/or PR+ and HER2-                                     | 84 (81)         | 51 (80)        | 77 (64)         | 33 (55)        |
| Triple negative                                              | 9 (9)           | 5 (8)          | 19 (16)         | 12 (20)        |
| HER2+                                                        | 11 (11)         | 8 (13)         | 24 (20)         | 15 (25)        |
| <b>Globo H Expression, n (%)</b>                             |                 |                |                 |                |
| 0                                                            | 25 (33)         | 14 (32)        | 19 (23)         | 11 (28)        |
| 1+                                                           | 24 (32)         | 15 (34)        | 33 (40)         | 15 (38)        |
| 2+                                                           | 13 (17)         | 6 (14)         | 14 (17)         | 4 (10)         |
| 3+                                                           | 14 (18)         | 9 (21)         | 17 (20)         | 10 (25)        |
| Not done                                                     | 28              | 20             | 37              | 20             |
| <b>Time From First BC to Day 1 (mo)</b>                      |                 |                |                 |                |
| Mean (SD)                                                    | 65 (57)         | 75 (76)        | 62 (56)         | 49 (38)        |
| Median (min, max)                                            | 53 (3, 307)     | 48 (5, 390)    | 48 (5, 275)     | 40 (5, 152)    |
| <b>Time From First Metastatic Diagnosis to Day 1 (mo)</b>    |                 |                |                 |                |
| Mean (SD)                                                    | 20 (19)         | 19 (20)        | 17 (13)         | 16 (10)        |
| Median (min, max)                                            | 12 (3, 87)      | 14 (3, 151)    | 12 (1, 74)      | 12 (4, 39)     |
| <b>Time From Last MBC Progression to Day 1 (mo)</b>          |                 |                |                 |                |
| N                                                            | 32              | 21             | 55              | 26             |
| Mean (SD)                                                    | 12 (9)          | 10 (5)         | 8 (4)           | 8 (5)          |
| Median (min, max)                                            | 10 (4, 36)      | 9 (1, 20)      | 7 (1, 22)       | 7 (1, 25)      |
| <b>Time From Last Anti-Cancer Treatment to Day 1 (day)</b>   |                 |                |                 |                |
| N                                                            | 88              | 59             | 114             | 55             |
| Mean (SD)                                                    | 175 (286)       | 182 (212)      | 113 (147)       | 101 (128)      |
| Median (min, max)                                            | 69 (28, 1545)   | 116 (12, 1219) | 55 (26, 1005)   | 63 (28, 689)   |
| <b>ECOG Performance Status, n (%)</b>                        |                 |                |                 |                |
| 0                                                            | 79 (76)         | 52 (81)        | 86 (72)         | 40 (67)        |
| 1                                                            | 25 (24)         | 12 (19)        | 33 (28)         | 20 (33)        |
| Not done                                                     | 0               | 0              | 1               | 0              |
| <b>Stage at Initial BC Diagnosis</b>                         |                 |                |                 |                |
| Stage 0                                                      | 1 (1)           | 0 (0)          | 0 (0)           | 0 (0)          |
| Stage I                                                      | 15 (14)         | 4 (6)          | 15 (13)         | 13 (22)        |
| Stage IIa                                                    | 17 (16)         | 11 (17)        | 27 (23)         | 6 (10)         |
| Stage IIb                                                    | 13 (13)         | 7 (11)         | 7 (6)           | 5 (8)          |
| Stage IIIa                                                   | 12 (12)         | 6 (9)          | 16 (13)         | 9 (15)         |
| Stage IIIb                                                   | 2 (2)           | 2 (3)          | 2 (2)           | 1 (2)          |
| Stage IIIc                                                   | 7 (7)           | 9 (14)         | 7 (6)           | 7 (12)         |
| Stage IV                                                     | 30 (29)         | 19 (30)        | 42 (35)         | 18 (30)        |
| Stage unknown                                                | 7 (7)           | 6 (9)          | 4 (3)           | 1 (2)          |

BC, breast cancer; ECOG, Eastern Cooperative Oncology Group; ER+, estrogen receptor-positive; HER2-, human epidermal growth factor receptor 2-negative; HER2+, human epidermal growth factor receptor 2-positive; IWRS, interactive Web response system; MBC, metastatic breast cancer; PR+, progesterone receptor-positive; SD, standard deviation.
