# Supplementary material for: Globo H-KLH vaccine adagloxad simolenin (OBI-822)/OBI-821 in patients with metastatic breast cancer: phase II randomized, placebo-controlled study
Source: PubMed Central journal article supplement — J Immunother Cancer. 2020 Jul 22;8(2):e000342. doi: 10.1136/jitc-2019-000342 (PMC7380846; doi:10.1136/jitc-2019-000342), 2020-07-22
Supplement: jitc-2019-000342supp007.pdf [file jitc-2019-000342supp007.pdf]

|    | Time Evaluated (Week) | ADCC fold change |    | Time Evaluated (Week) | ADCC fold change |    | Time Evaluated (Week) | ADCC fold change |    | Time Evaluated (Week) | ADCC fold change |
|----|-----------------------|------------------|----|-----------------------|------------------|----|-----------------------|------------------|----|-----------------------|------------------|
| 1  | 4                     | 0.612            | 11 | 40                    | <b>1.162</b>     | 21 | 16                    | 0.900            | 31 | 40                    | 0.880            |
| 2  | 16                    | <b>2.036</b>     | 12 | 40                    | 0.747            | 22 | 4                     | <b>1.100</b>     | 32 | 4                     | 1.080            |
| 3  | 4                     | <b>2.049</b>     | 13 | 4                     | <b>1.336</b>     | 23 | 16                    | <b>2.130</b>     | 33 | 16                    | <b>1.588</b>     |
| 4  | 40                    | <b>1.591</b>     | 14 | 16                    | 0.960            | 24 | 16                    | 0.890            | 34 | 4                     | 0.594            |
| 5  | 16                    | 0.843            | 15 | 40                    | 0.970            | 25 | 16                    | <b>1.100</b>     | 35 | 4                     | 0.687            |
| 6  | 40                    | <b>1.557</b>     | 16 | 16                    | <b>1.252</b>     | 26 | 40                    | <b>1.320</b>     | 36 | 4                     | 0.819            |
| 7  | 16                    | 0.990            | 17 | 16                    | 0.700            | 27 | 40                    | 0.915            | 37 | 16                    | 0.990            |
| 8  | 4                     | 1.008            | 18 | 4                     | 1.060            | 28 | 4                     | 0.920            | 38 | 40                    | 0.809            |
| 9  | 40                    | <b>2.621</b>     | 19 | 40                    | <b>1.443</b>     | 29 | 16                    | 0.980            | 39 | 16                    | 0.845            |
| 10 | 40                    | <b>1.390</b>     | 20 | 16                    | <b>1.159</b>     | 30 | 4                     | <b>1.129</b>     | 40 | 40                    | 0.786            |

≥1.10 as positive, which will give 17/40 positive. Red bold numbers indicate a significant change.
