# Supplementary figures and images for: Globo H-KLH vaccine adagloxad simolenin (OBI-822)/OBI-821 in patients with metastatic breast cancer: phase II randomized, placebo-controlled study
Source: PubMed Central journal article supplement — J Immunother Cancer. 2020 Jul 22;8(2):e000342. doi: 10.1136/jitc-2019-000342 (PMC7380846; doi:10.1136/jitc-2019-000342), 2020-07-22

# KLH IgG at Week 40

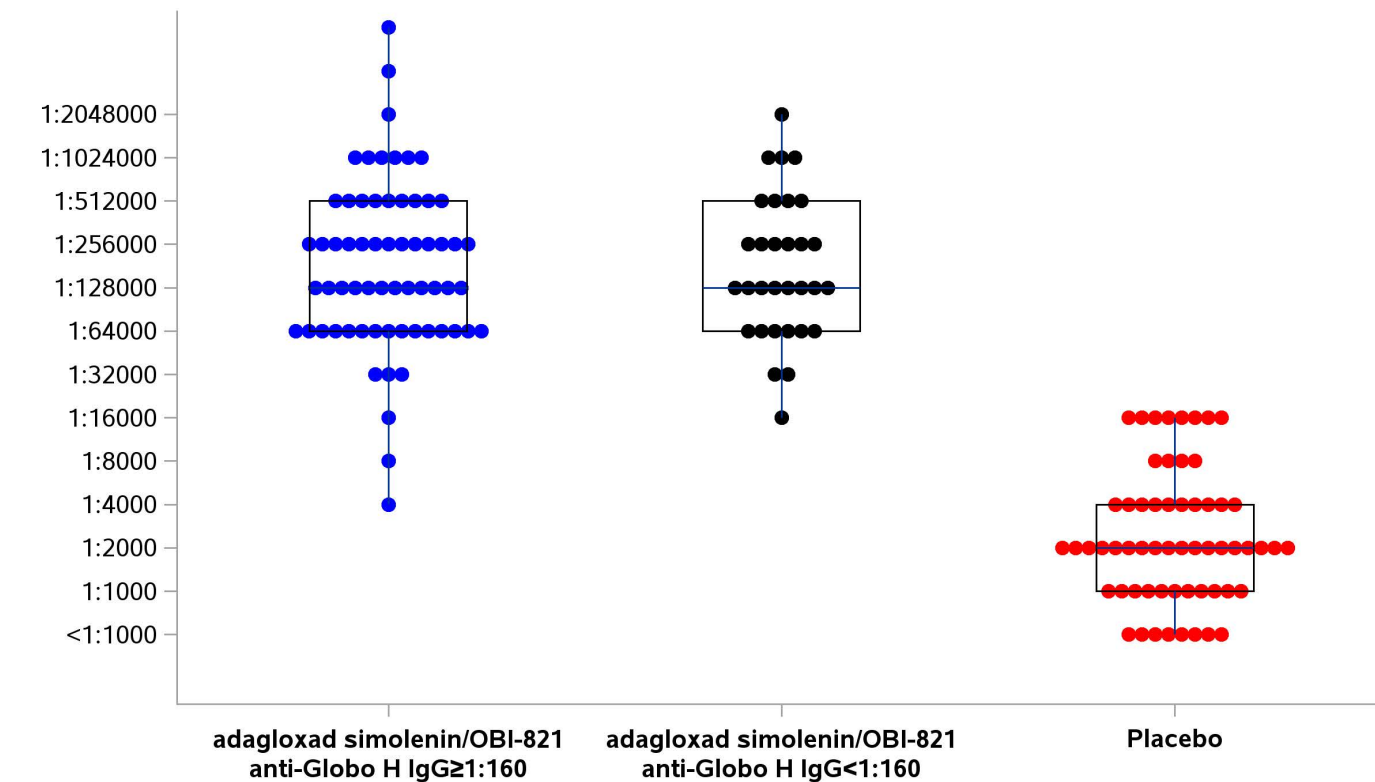

|           |          |          |        |
|-----------|----------|----------|--------|
| N         | 64       | 31       | 59     |
| Mean      | 484937.5 | 328774.2 | 4254.2 |
| Median    | 128000.0 | 128000.0 | 2000.0 |
| Geo. Mean | 179069.4 | 175048.7 | 2385.4 |

Supplement: jitc-2019-000342supp002.pdf [file jitc-2019-000342supp002.pdf]

**A**

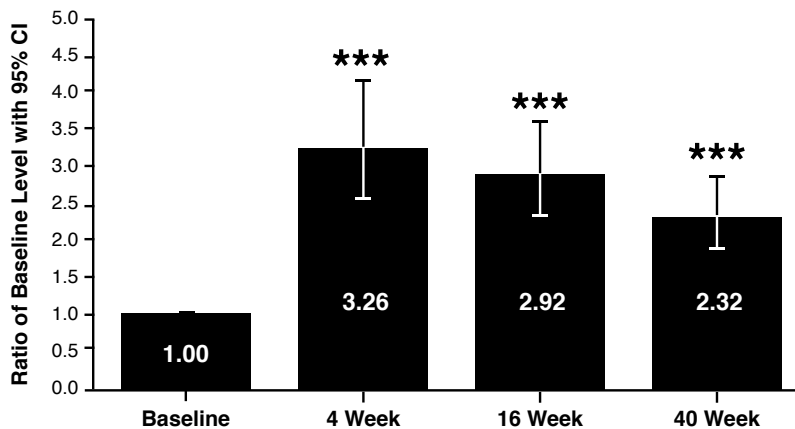

**B**

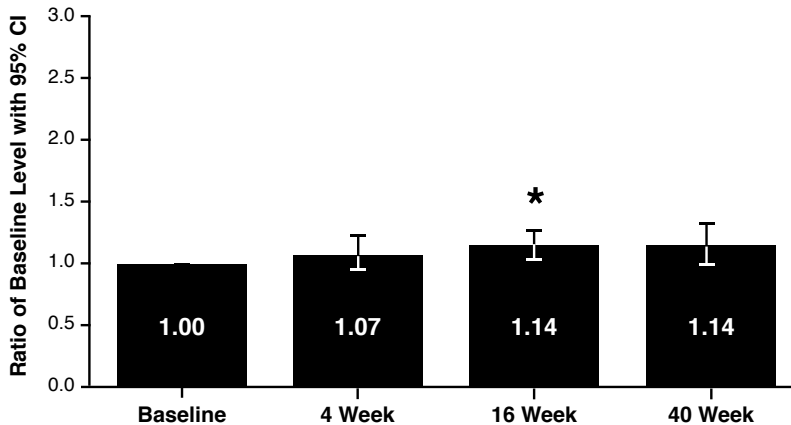

Paired t test with baseline: \* $P < 0.05$ , \*\*\* $P < 0.0001$

Supplement: jitc-2019-000342supp005.pdf [file jitc-2019-000342supp005.pdf]

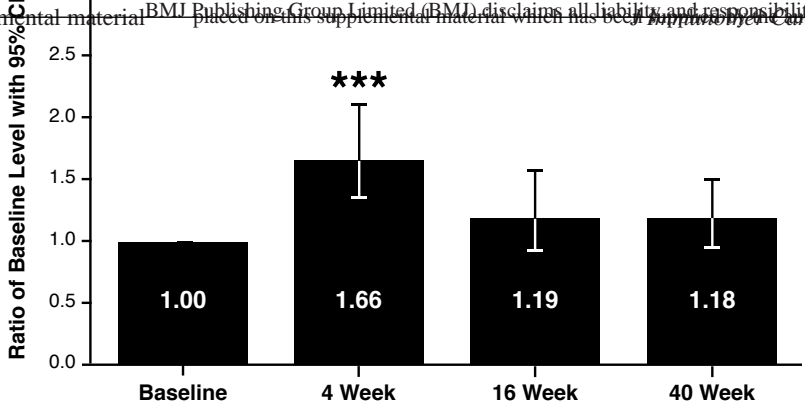

Paired t test with baseline: \*\*\*  $P < 0.0001$

Supplement: jitc-2019-000342supp006.pdf [file jitc-2019-000342supp006.pdf]
